# Supplementary material for: Smoking and overweight determine the likelihood of developing rheumatoid arthritis
Source: HighWire-hosted journal article supplement (doi:10.1136/annrheumdis-2012-202254), 2012-10-29
Supplement: annrheumdis-2012-202254supp_table.pdf [file annrheumdis-2012-202254supp_table.pdf]

**Supplementary table S1. Disease activity at baseline and arthritis onset**

| <b>Disease activity parameter</b> | <b>No arthritis developed;<br/><i>Baseline</i><br/>N=40</b> | <b>Arthritis developed;<br/><i>Baseline</i><br/>N=15</b> | <b>Arthritis developed;<br/><i>Arthritis onset</i><br/>N=15</b> |
|-----------------------------------|-------------------------------------------------------------|----------------------------------------------------------|-----------------------------------------------------------------|
| 68TJC (n) (median (IQR))          | 2 (0-8)                                                     | 2 (0-8)                                                  | 8 (3-16) *                                                      |
| 66SJC (n) (median (IQR))          | 0 (0)                                                       | 0 (0)                                                    | 5 (2-7) **                                                      |
| ESR (mm/hr) (median (IQR))        | 9 (2-20)                                                    | 7 (5-15)                                                 | 12 (6-17)**                                                     |
| CRP (mg/L) (median (IQR))         | 2.1 (1.0-4.3)                                               | 4.0 (1.5-10.0)                                           | 5.2 (2.1-8.4) ***                                               |

68TJC: tender joint count of 68 joints; 66SJC: swollen joint count of 66 joints.  
 ESR: erythrocyte sedimentation rate; CRP: C-reactive protein;  
 \* missing n=5; \*\* missing n=1; \*\*\* missing n=3
